# Supplementary material
Source: publisher figshare collection journal article supplement (https://gsajournals.figshare.com/ndownloader/files/15159524)
Supplement: Supplementary file 1 [file 15159524]

## Sheet: Human GST
Class	Gene name	Chromosomal location	Accession number
Alpha	GSTA1	6p12.2	NP_665683
	GSTA2	6p12.2	NP_000837
	GSTA3	6p12.2	NP_000838
	GSTA4	6p12.2	NP_001503
	GSTA5	6p12.2	NP_714543
	GSTAP1	6p12	ENSG00000223622
	GSTAP2	6p12	ENSG00000230845
	GSTAP3	6p12	ENSG00000230375
	GSTAP4	6p12	ENSG00000243236
	GSTAP5	6p12	ENSG00000217228
	GSTAP6	6p12	ENSG00000237674
	GSTAP7	6p12	ENSG00000220377
Mu	GSTM1	1p13.3	NP_666533
	GSTM2	1p13.3	NP_000839
	GSTM3	1p13.3	NP_000840
	GSTM4	1p13.3	NP_671489
	GSTM5	1p13.3	NP_000842
Pi	GSTP1	11q13.3	NP_000843
Theta	GSTT1	22q11.23	NP_000844
	GSTT2	22q11.23	NP_000845
	GSTT2B	22q11.23	NM_001080843.3
Zeta	GSTZ1	14q24.3	NP_665877
Omega	GSTO1	10q25.1	NP_004823
	GSTO2	10q25.1	NP_899062
Sigma	HPGDS	4q22.3	NP_055300
Board P G, Menon D. Glutathione transferases, regulators of cellular metabolism and physiology. BBA - General Subjects, 2013, 1830(5):3267-3288.
Morel, F., Rauch, C., Coles, B., Le, E. F., & Guillouzo, A. (2002). The human glutathione transferase alpha locus: genomic organization of the gene cluster and functional characterization of the genetic polymorphism in the hgsta1 promoter. Pharmacogenetics, 12(4), 277.

## Sheet: GST genes
Common name	Scientific name	Chromosome/Contig/Scaffold	Start	End	Strand	Gene name
Bottlenose dolphin	Tursiops truncatus	scaffold_2665	311957	308621	-	GSTA1 PARTIAL
		scaffold_2665	323589	320240	-	GSTAP
		scaffold_2665	365839	350600	-	GSTA2 PARTIAL
		scaffold_108534	142914	127426	-	GSTM1
		scaffold_108534	108041	111068	+	GSTM2 PARTIAL
		scaffold_346	105104	104464	-	GSTMP1
		scaffold_92999	45936	46298	+	GSTMP2
		scaffold_114085	72325	71941	-	GSTMP3
		scaffold_1888	6045	15048	+	GSTO1 PARTIAL
		scaffold_1888	21876	38103	+	GSTO2
		scaffold_2747	129465	131857	+	GSTP1 PARTIAL
		scaffold_376	2083	4910	+	GSTP2 PARTIAL
		scaffold_112770	740825	741266	+	GSTPP
		scaffold_3218	135610	139308	+	GSTT1P
		scaffold_3218	146147	151431	+	GSTT2
		scaffold_2443	102162	108973	+	GSTZ1 PARTIAL
		scaffold_2281	137274	107764	-	HPGDS
Killer whale	Orcinus orca	NW_004438672.1	1221243	1206859	-	GSTA1
		NW_004438672.1	1180635	1174939	-	GSTAP
		NW_004438672.1	1168761	1160286	-	GSTA2
		NW_004438417.1	24678998	24694191	+	GSTMP1
		NW_004438417.1	24713421	24710381	-	GSTM1
		NW_004438540.1	7480061	7479492	-	GSTMP2
		NW_004438596.1	958767	958339	-	GSTMP3
		NW_004438773.1	130169	129767	-	GSTMP4
		NW_004438429.1	24706574	24697563	-	GSTO1
		NW_004438429.1	24690780	24674458	-	GSTO2
		NW_004438509.1	4448204	4450601	+	GSTP1
		NW_004438509.1	4483629	4486050	+	GSTP2
		NW_004438491.1	8429355	8428914	-	GSTPP
		NW_004438489.1	10946841	10955289	+	GSTT1P
		NW_004438489.1	10957036	10962087	+	GSTT2
		NW_004438415.1	15570460	15576931	+	GSTZ1
		NW_004438503.1	5284422	5255322	-	HPGDS
Yangtze finless porpoise	Neophocaena phocaenoides	scaffold962	522101	536474	+	GSTA1
		scaffold962	563215	568025	+	GSTAP
		scaffold962	580387	588805	+	GSTA2
		scaffold35	1224711	1211402	-	GSTMP1
		scaffold35	1191666	1194690	+	GSTM1
		scaffold243	1443818	1443269	-	GSTMP2
		scaffold414	14473	14871	+	GSTMP3
		scaffold424	3599881	3599308	-	GSTMP4
		scaffold240	6785674	6797085	+	GSTO1
		scaffold240	6803844	6820196	+	GSTO2
		scaffold43	5282935	5280557	-	GSTP1 PARTIAL
		scaffold43	5253133	5250711	-	GSTP2 PARTIAL
		scaffold371	5763048	5762700	-	GSTPP
		scaffold110	7828812	7837219	+	GSTT1P
		scaffold110	7838961	7844460	+	GSTT2
		scaffold49	2744885	2738459	-	GSTZ1 PARTIAL
		scaffold7	14924249	14952794	+	HPGDS
Baiji	Lipotes vexillifer	NW_006778796.1	4860723	4846298	-	GSTA1
		NW_006778796.1	4820755	4817404	-	GSTAP
		NW_006778796.1	4802593	4794171	-	GSTA2
		NW_006774564.1	2070163	2054712	-	GSTMP1
		NW_006774564.1	2035418	2038526	+	GSTM1
		NW_006784589.1	592194	591645	-	GSTMP2
		NW_006776528.1	703471	704366	+	GSTMP3
		NW_006787679.1	821529	821179	-	GSTMP4
		NW_006798383.1	4402723	4413866	+	GSTO1
		NW_006798383.1	4421640	4437971	+	GSTO2
		NW_006776536.1	646732	644202	-	GSTP1
		NW_006776536.1	611193	608777	-	GSTP2
		NW_006794929.1	851929	851488	-	GSTPP
		NW_006777435.1	840363	848536	+	GSTT1P
		NW_006777435.1	850277	855345	+	GSTT2
		NW_006787038.1	4023665	4031942	+	GSTZ1
		NW_006775603.1	4883267	4853702	-	HPGDS
Sperm whale	Physeter macrocephalus	NW_006724412.1	354722	368852	+	GSTA1
		NW_006724412.1	390996	397095	+	GSTAP
		NW_006724412.1	407367	415823	+	GSTA2
		NW_006713392.1	616825	619259	+	GSTMP1
		NW_006713392.1	636916	633811	-	GSTM1
		NW_006713123.1	415302	415879	+	GSTMP2
		NW_006714483.1	116362	116913	+	GSTMP3
		NW_006717948.1	29297	29702	+	GSTMP4
		NW_006714478.1	170393	159571	-	GSTO1
		NW_006714478.1	153291	136621	-	GSTO2
		NW_006724202.1	818297	815914	-	GSTP1
		NW_006724202.1	784002	781564	-	GSTP2
		NW_006716229.1	84194	84622	+	GSTPP
		NW_006724217.1	795454	791797	-	GSTT1 PARTIAL
		NW_006724217.1	786260	781181	-	GSTT2
		NW_006713461.1	431432	437872	+	GSTZ1
		NW_006712764.1	245841	272640	+	HPGDS
Minke whale	Balaenoptera acutorostrata	NW_006732678.1	7666132	7651799	-	GSTA1
		NW_006732678.1	7613441	7607478	-	GSTAP
		NW_006732678.1	7598491	7590280	-	GSTA2
		NW_006725576.1	10463283	10446972	-	GSTM1
		NW_006725576.1	10427044	10430079	+	GSTM2 PARTIAL
		NW_006725654.1	1932901	1933235	+	GSTMP1
		NW_006727021.1	698721	699305	+	GSTMP2
		NW_006727464.1	223664	224298	+	GSTMP3
		NW_006725776.1	1179887	1168416	-	GSTO1
		NW_006725776.1	1161625	1144988	-	GSTO2 PARTIAL
		NW_006725687.1	19989283	19992315	+	GSTP1
		NW_006725687.1	20026301	20028694	+	GSTP2
		NW_006725687.1	20026301	20028694	+	GSTPP
		NW_006733789.1	7597041	7604904	+	GSTT1P
		NW_006733789.1	7606646	7611709	+	GSTT2 PARTIAL
		NW_006727797.1	13609812	13616393	+	GSTZ1
		NW_006727686.1	4852036	4879651	+	HPGDS
Bowhead whale	Balaena mysticetus	scaffold_90	846508	832505	-	GSTA1
		scaffold_90	775362	767188	-	GSTA2
		scaffold_663	271424	286063	+	GSTM1
		scaffold_663	304206	302002	-	GSTM2 PARTIAL
		scaffold_750	610199	609559	-	GSTMP1
		scaffold_1063	10084	9692	-	GSTMP2
		scaffold_3148	32108	31524	-	GSTMP3
		scaffold_2004	170118	158941	-	GSTO1
		scaffold_2004	152206	136077	-	GSTO2
		scaffold_331	1305203	1307243	+	GSTP1 PARTIAL
		scaffold_331	1341287	1343724	+	GSTP2 PARTIAL
		scaffold_479	103440	103852	+	GSTPP
		scaffold_2197	210071	217989	+	GSTT1P
		scaffold_2197	219734	224809	+	GSTT2 PARTIAL
		scaffold_101	540634	539031	-	GSTZ1 PARTIAL
		scaffold_1495	489513	464472	-	HPGDS
Cow	Bos taurus	chr23	24976300	24963702	-	GSTA1
		chr23	24948084	24935596	-	GSTAP1
		chr23	24909300	24895016	-	GSTA2
		chr23	24883511	24875681	-	GSTA3
		chr23	24862758	24851483	-	GSTAP2
		chr23	24831484	24823888	-	GSTA4
		chr3	33880574	33874472	-	GSTM1
		chr3	33846022	33837428	-	GSTM2
		chr3	33834835	33824883	-	GSTM3
		chr3	33816372	33806213	-	GSTM4
		chr3	33800618	33783445	-	GSTM5
		chr3	33768057	33770309	+	GSTM6
		chr12	675500	675785	+	GSTMP1
		chr29	33609765	33610289	+	GSTMP2
		chr26	25088529	25097647	+	GSTO1
		chr26	25103880	25119551	+	GSTO2
		chr26	25060499	25073427	+	GSTO3
		chr29	46054893	46057276	+	GSTP1
		chr29	46087414	46089928	+	GSTP2
		chr17	73300188	73307534	+	GSTT1
		chr17	73309974	73315068	+	GSTT2
		chr10	89596890	89604430	+	GSTZ1
		chr6	31710456	31727197	+	HPGDS
Tibetan yak	Bos mutus	NW_005397583.1	56986	71271	+	GSTA1
		NW_005394842.1	15320	2628	-	GSTA2
		NW_005392861.1	8027	406	-	GSTA3
		NW_005392861.1	38475	27113	-	GSTA4
		NW_005395320.1	87342	86694	-	GSTAP1
		NW_005395251.1	1532	16762	+	GSTA5
		NW_005393277.1	1391542	1385424	-	GSTM1
		NW_005393277.1	1356954	1348386	-	GSTM2
		NW_005393277.1	1345755	1335759	-	GSTM3
		NW_005393277.1	1327289	1316963	-	GSTM4
		NW_005393277.1	1311397	1294237	-	GSTM5
		NW_005393277.1	1278860	1281112	+	GSTM6
		NW_005394722.1	1004151	991347	-	GSTO1
		NW_005394722.1	976231	968448	-	GSTO2
		NW_005394722.1	962214	946296	-	GSTO3
		NW_005394695.1	1086544	1088911	+	GSTP1
		NW_005394695.1	1116966	1119482	+	GSTP2
		NW_005394378.1	127733	122000	-	GSTT1
		NW_005394378.1	116726	109453	-	GSTT2
		NW_005394378.1	106794	101635	-	GSTT3
		NW_005398357.1	19343	11806	-	GSTZ1
		NW_005395035.1	1308044	1291382	-	HPGDS
Sheep	Ovis aries	chr20	25013859	25001642	-	GSTA1
		chr20	24946521	24932542	-	GSTA2
		chr20	24922967	24917485	-	GSTA3
		chr20	24906447	24895654	-	GSTA4
		chr20	24879381	24871712	-	GSTA5
		chr7	97264259	97264927	+	GSTA6
		chr17	15414895	15414358	-	GSTAP
		chr1	86103902	86112509	+	GSTM1
		chr1	86140140	86148981	+	GSTM2
		chr1	86170117	86171539	+	GSTM3
		chr1	86179804	86193370	+	GSTM4
		chr1	86199012	86221997	+	GSTM5
		chr1	86237856	86234710	-	GSTM6
		chr10	997316	997545	+	GSTMP1
		chr21	32268417	32268913	+	GSTMP2
		chr22	23878095	23890371	+	GSTO1
		chr22	23908434	23916771	+	GSTO2
		chr22	23924028	23940757	+	GSTO3
		chr7	76460329	76459604	-	GSTO4
		chr21	44692848	44694961	+	GSTP1
		chr21	44720826	44722766	+	GSTP2
		chr17	70578936	70591655	+	GSTT1
		chr17	70594129	70598917	+	GSTT2
		chr7	85489219	85496611	+	GSTZ1
		chr6	30292032	30307578	+	HPGDS
Tibetan antelope	Pantholops hodgsonii	NW_005806736.1	629020	641168	+	GSTA1
		NW_005806736.1	697691	713107	+	GSTA2
		NW_005806736.1	723371	731434	+	GSTA3
		NW_005806736.1	741291	751741	+	GSTA4
		NW_005806736.1	775760	783351	+	GSTA5
		NW_005804725.1	793985	793434	-	GSTAP
		NW_005813453.1	66278	57644	-	GSTM1
		NW_005813453.1	29814	18626	-	GSTM2
		NW_005813453.1	18322	5367	-	GSTM3
		NW_005818795.1	1041069	1027793	-	GSTM4
		NW_005818795.1	1022556	986950	-	GSTM5
		NW_005818795.1	984316	987440	+	GSTM6
		NW_005813409.1	451428	462614	+	GSTO1
		NW_005813409.1	480039	488584	+	GSTO2
		NW_005810114.1	1245158	1245883	-	GSTO3
		NW_005810996.1	48264	46323	-	GSTP1
		NW_005810996.1	21376	19212	-	GSTP2
		NW_005808332.1	316943	321939	+	GSTT1
		NW_005808332.1	324386	329212	+	GSTT2
		NW_005811569.1	2719971	2712704	-	GSTZ1
		NW_005816419.1	216701	201134	-	HPGDS
Weddell seal	Leptonychotes weddellii	NW_006385838.1	305583	296718	-	GSTA1 PARTIAL
		NW_006385838.1	236389	230552	-	GSTA2
		NW_006385838.1	219883	213365	-	GSTA3
		NW_006383120.1	967442	968058	+	GSTAP
		NW_006384601.1	214171	209427	-	GSTM1
		NW_006384601.1	193067	195133	+	GSTM2
		NW_006383076.1	2224242	2223587	-	GSTM3
		NW_006383055.1	4821099	4820464	-	GSTMP1
		NW_006387651.1	43548	44174	+	GSTMP2
		NW_006384846.1	436159	446635	+	GSTO1
		NW_006384846.1	453828	457464	+	GSTO2
		NW_006384721.1	312068	309571	-	GSTP1
		NW_006384721.1	265722	263400	-	GSTP2
		NW_006383048.1	3123681	3124093	+	GSTP3 PARTIAL
		NW_006383096.1	2013316	2013868	+	GSTP4 PARTIAL
		NW_006383397.1	1558457	1559002	+	GSTPP
		NW_006383098.1	1376235	1376717	+	GSTP5
		NW_006383313.1	1332058	1332685	+	GSTP6
		NW_006385210.1	55326	62180	+	GSTT1
		NW_006385279.1	408631	419968	+	GSTT2
		NW_006386919.1	124401	129489	+	GSTZ1
		NW_006383499.1	513792	503015	-	HPGDS
Pacific walrus	Odobenus rosmarus divergens	NW_004450762.1	1451958	1458679	+	GSTA1
		NW_004450762.1	1470524	1477605	+	GSTA2
		NW_004450402.1	413394	414012	+	GSTA3
		NW_004450402.1	1389559	1406160	+	GSTA4
		NW_004450567.1	1248547	1248037	-	GSTAP
		NW_004450591.1	1282626	1280044	-	GSTM1
		NW_004450591.1	1261217	1263286	+	GSTM2
		NW_004450581.1	98233	98891	+	GSTM3
		NW_004450838.1	1407507	1406847	-	GSTM4
		NW_004451511.1	17869	17209	-	GSTM5
		NW_004452022.1	206327	205672	-	GSTM6
		NW_004450279.1	1621489	1620829	-	GSTMP1
		NW_004450392.1	2930837	2930193	-	GSTMP2
		NW_004452741.1	28119	37830	+	GSTO1
		NW_004452741.1	46253	63251	+	GSTO2
		NW_004450289.1	2812747	2810251	-	gstp1
		NW_004450289.1	2781737	2779406	-	gstp2
		NW_004450288.1	755632	756169	+	gstp3
		NW_004450854.1	673946	674463	+	gstpp
		NW_004451294.1	513589	514208	+	gstp4
		NW_004451716.1	327592	327110	-	gstp5
		NW_004450381.1	1371481	1381075	+	GSTT1
		NW_004450381.1	1383246	1390117	+	GSTT2
		NW_004450358.1	1578537	1572123	-	GSTZ1
		NW_004450264.1	6612860	6630880	+	HPGDS
Dog	Canis lupus familiaris	NC_006594.3	20442169	20427198	-	GSTA1
		NC_006594.3	20372165	20367121	-	GSTA2
		NC_006594.3	20357539	20349412	-	GSTA3
		NC_006594.3	20333798	20320167	-	GSTA4
		NC_006613.3	24100800	24101455	+	GSTA5
		NC_006615.3	5363648	5364301	+	GSTAP
		NC_006588.3	42207758	42203033	-	GSTM1
		NC_006588.3	42188462	42191175	+	GSTM2
		NC_006587.3	47893887	47893236	-	GSTMP1
		NC_006604.3	16989142	16988940	-	GSTMP2
		NC_006621.3	39227313	39227796	+	GSTMP3
		NC_006610.3	16569762	16579141	+	GSTO1
		NC_006610.3	16587096	16604844	+	GSTO2
		NC_006621.3	10616521	10617153	+	gstp1
		NC_006591.3	47025688	47025056	-	gstp2
		NC_006596.3	6515364	6514732	-	gstp3
		NC_006606.3	36339801	36340427	+	gstp4
		NC_006614.3	22975143	22975727	+	gstp5
		NC_006611.3	29944972	29944340	-	GSTP6
		NC_006583.3	35710423	35709816	-	GSTPP1
		NC_006585.3	21291142	21291645	+	GSTPP2
		NC_006586.3	58672643	58672024	-	GSTPP3
		NC_006598.3	46015846	46016470	+	GSTPP4
		NC_006607.3	45285751	45285131	-	GSTPP5
		NC_006614.3	18743649	18743097	-	GSTPP6
		NC_006608.3	28545597	28535133	-	GSTT1
		NC_006608.3	28532552	28526421	-	GSTT2
		NC_006590.3	50136796	50143047	+	GSTZ1
		NC_006614.3	17189253	17172560	-	HPGDS
Horse	Equus caballus	NC_009163.2	50613793	50600283	-	GSTA1
		NC_009163.2	50518164	50508694	-	GSTA2
		NC_009163.2	50487044	50477334	-	GSTA3
		NC_009163.2	50466964	50457443	-	GSTA4
		NC_009163.2	50425513	50435062	+	GSTA5
		NC_009163.2	50412744	50415980	+	GSTA6
		NC_009163.2	50404376	50397989	-	GSTAP
		NC_009163.2	50357534	50347226	-	GSTA7
		NW_001868821.1	45491	35918	-	GSTA8
		NW_001868821.1	3515	13344	+	GSTA9
		NC_009148.2	58459595	58455084	-	GSTM1
		NC_009148.2	58445589	58441277	-	GSTM2
		NC_009148.2	58434064	58429383	-	GSTM3
		NC_009148.2	58419880	58422750	+	GSTM4
		NC_009145.2	30601798	30601567	-	GSTMP1
		NC_009175.2	36840484	36840937	+	GSTMP2
		NC_009144.2	26116965	26105075	-	GSTO1
		NC_009144.2	26096903	26079859	-	GSTO2
		NC_009155.2	27260358	27262826	+	GSTP1
		NC_009155.2	27292142	27294513	+	GSTP2
		NC_009151.2	1495423	1486925	-	GSTT1
		NC_009151.2	1484501	1481257	-	GSTT2
		NC_009167.2	22681192	22687981	+	GSTZ1
		NC_009146.2	44363667	44382892	+	HPGDS
Microbat	Myotis lucifugus	NW_005871159.1	3515522	3499246	-	GSTA1
		NW_005871159.1	3450904	3439723	-	GSTA2
		NW_005871159.1	3424106	3417889	-	GSTA3
		NW_005871159.1	3409828	3395147	-	GSTA4
		NW_005874859.1	9173	7116	-	GSTA5
		NW_005877976.1	7704	1450	-	GSTA6
		NW_005871149.1	3351868	3346651	-	GSTM1
		NW_005871149.1	3343931	3339573	-	GSTM2
		NW_005871149.1	3322537	3324482	+	GSTM3
		NW_005871063.1	14597569	14597346	-	GSTM4 PARTIAL
		NW_005871253.1	1678680	1678914	+	GSTMP
		NW_005871210.1	2221889	2230767	+	GSTO1
		NW_005871210.1	2236096	2245923	+	GSTO2
		NW_005871463.1	493751	491544	-	GSTP1
		NW_005871050.1	12198862	12198238	-	GSTPP1
		NW_005871163.1	3161039	3161638	+	GSTPP2
		NW_005871172.1	1233995	1234515	+	GSTPP3
		NW_005871244.1	301132	300608	-	GSTPP4
		NW_005871369.1	760261	759724	-	GSTPP5
		NW_005871838.1	6114	1824	-	GSTT1
		NW_005871838.1	12582	10517	-	GSTT2
		NW_005871838.1	17424	15467	-	GSTT3
		NW_005872469.1	62194	59921	-	GSTT4
		NW_005871082.1	557470	563918	+	GSTZ1
		NW_005871060.1	13746368	13727246	-	HPGDS
Mouse	Mus musculus	NC_000075.6	78232240	78242534	+	GSTA1
		NC_000075.6	78258712	78269017	+	GSTA2
		NC_000075.6	78294806	78305417	+	GSTA3
		NC_000075.6	78341916	78331127	-	GSTA4
		NC_000067.6	21298085	21285660	-	GSTAP
		NC_000067.6	21180470	21187381	+	GSTA5
		NC_000069.6	108044660	108041280	-	GSTM1
		NC_000069.6	107986103	107982094	-	GSTM2
		NC_000069.6	107968828	107964249	-	GSTM3
		NC_000069.6	107953113	107950823	-	GSTMP1
		NC_000069.6	107943311	107939273	-	GSTM4
		NC_000069.6	107931654	107926933	-	GSTM5
		NC_000069.6	107911243	107906818	-	GSTMP2
		NC_000069.6	107895975	107906809	+	GSTMP3
		NC_000071.6	116633456	116632968	-	GSTMP4
		NC_000084.6	31820406	31819907	-	GSTM6
		NC_000085.6	47855250	47855295	+	GSTO1
		NC_000085.6	47872024	47886158	+	GSTO2
		NW_004058054.1	44858	43569	-	gstp1
		NW_004058054.1	27707	26368	-	gstp2
		NW_004058054.1	23413	21490	-	gstp3
		NC_000085.6	4058843	4057554	-	gstp4
		NC_000085.6	4041692	4040353	-	gstp5
		NC_000085.6	4037398	4035475	-	gstp6
		NC_000067.6	192074452	192073822	-	gstp7
		NC_000076.6	75798490	75784039	-	GSTT1
		NC_000076.6	75780958	75774874	-	GSTT2
		NC_000076.6	75831550	75834665	+	GSTT3
		NC_000078.6	87157891	87163808	+	gstz1
		NC_000072.6	65120088	65138169	-	HPGDS
Naked mole rat	Heterocephalus glaber	NW_004624850.1	209282	201602	-	GSTA1
		NW_004624812.1	3646021	3645549	-	GSTA2
		NW_004624855.1	3302222	3310199	+	GSTAP
		NW_004624855.1	3351836	3375651	+	GSTA3
		NW_004624772.1	5392582	5396955	+	GSTM1
		NW_004624772.1	5400979	5405232	+	GSTM2
		NW_004624772.1	5429695	5434959	+	GSTM3
		NW_004624772.1	5461203	5463095	+	GSTM4
		NW_004624772.1	5498546	5495564	-	GSTM5
		NW_004624750.1	26837350	26837945	+	GSTM6
		NW_004624767.1	13304464	13304825	+	GSTM7
		NW_004624774.1	4583747	4583256	-	GSTM8
		NW_004624842.1	2956455	2955963	-	GSTM9
		NW_004624834.1	5701224	5700725	-	GSTM10
		NW_004624831.1	3342650	3351581	+	GSTO1
		NW_004624831.1	3357150	3373889	+	GSTOP
		NW_004624767.1	19010532	19008726	-	GSTP1
		NW_004624767.1	18960795	18958523	-	GSTP2
		NW_004624747.1	10282951	10270398	-	GSTT1
		NW_004624747.1	10268675	10264744	-	GSTT2
		NW_004624734.1	24583078	24575540	-	GSTZ1
		NW_004624757.1	22139937	22115107	-	HPGDS
Elephant	Loxodonta africana	NW_003573420.1	110637850	110656980	+	GSTA1
		NW_003573420.1	110667282	110719976	+	GSTA2
		NW_003573420.1	110731912	110822141	+	GSTA3
		NW_003573420.1	110834372	110845583	+	GSTA4
		NW_003573431.1	54482289	54477898	-	GSTM1
		NW_003573431.1	54510433	54506642	-	GSTM2
		NW_003573431.1	54571514	54575857	+	GSTM3
		NW_003573431.1	54598612	54602981	+	GSTM4
		NW_003573431.1	54636462	54641237	+	GSTM5
		NW_003573431.1	54666120	54670979	+	GSTM6
		NW_003573431.1	54745605	54748006	+	GSTM7
		NW_003573431.1	54773319	54769878	-	GSTM8
		NW_003573430.1	14217645	14210212	-	GSTO1
		NW_003573430.1	14197023	14171479	-	GSTO2
		NW_003573491.1	2012884	2010206	-	GSTP1
		NW_003573488.1	785550	791586	+	GSTT1
		NW_003573488.1	795589	800223	+	GSTT2_PARTIAL
		NW_003573429.1	53390822	53398050	+	GSTZ1
		NW_003573450.1	445038	475256	+	HPGDS
West Indian manatee	Trichechus manatus latirostris	NW_004444151.1	3638375	3612779	-	GSTA1
		NW_004444151.1	3496309	3484635	-	GSTA2
		NW_004443985.1	7165220	7165849	+	GSTA3
		NW_004444140.1	208445	212830	+	GSTM1
		NW_004444140.1	116426	112032	-	GSTM2
		NW_004444140.1	91890	87211	-	GSTM3
		NW_004444140.1	67311	61995	-	GSTM4
		NW_004444140.1	47396	49625	+	GSTM5
		NW_004444140.1	7848	12162	+	GSTM6
		NW_004444233.1	1392365	1336976	-	GSTM7
		NW_004444233.1	1336581	1332005	-	GSTM8
		NW_004443943.1	30764473	30774766	+	GSTO1
		NW_004443943.1	30800234	30819706	+	GSTO2
		NW_004444049.1	3828061	3825476	-	GSTP1
		NW_004444093.1	2105202	2113238	+	GSTT1
		NW_004444093.1	2115024	2121536	+	GSTT2
		NW_004443946.1	30222713	30230037	+	GSTZ1
		NW_004444114.1	3164438	3192486	+	HPGDS

## Sheet: Flanking genes
Common name	Scientific name	Class	Chromosome/Contig/Scaffold	Start	End	Strand	Gene name
Bottlenose dolphin	Tursiops truncatus	Alpha	scaffold_2665	430983	431070	+	FBXO9
			scaffold_2665	403611	377864	-	ICK
			scaffold_2665	289326	295126	+	TMEM14A
			scaffold_2665	200310	138189	-	TRAM2
		Mu	scaffold_1671	170650	172283	+	AMPD2
			scaffold_108534	95090	104989	+	EPS8L3
			scaffold_1671	157018	148621	-	GNAT2
		Sigma	scaffold_2281	32745	101889	+	SMARCAD1
			scaffold_2281	261197	261291	+	PDLIM5
		Zeta	scaffold_2443	98466	52693	-	POMT2
			scaffold_2443	147118	123037	-	TMED8
		Theta	scaffold_3218	163825	174158	+	CABIN1
			scaffold_3218	153579	155880	+	DDT
			scaffold_3218	153579	154196	+	DDTL
			scaffold_3218	104482	105040	+	MIF
		Pi	scaffold_2747	122929	120133	-	CABP2
			scaffold_376	17951	22448	+	NDUFV1
		Omega	scaffold_2099	63272	44360	-	CFAP43
			scaffold_1888	55216	53587	-	ITPRIP
Killer whale	Orcinus orca	Alpha	NW_004438672.1	1287931	1288018	+	FBXO9
			NW_004438672.1	1260603	1229352	-	ICK
			NW_004438672.1	1147384	1152573	+	TMEM14A
			NW_004438672.1	1057679	987632	-	TRAM2
		Mu	NW_004438417.1	24617419	24618686	+	AMPD2
			NW_004438417.1	24726250	24716388	-	EPS8L3
		Sigma	NW_004450264.1	6708689	6635694	-	SMARCAD1
			NW_004450264.1	6525109	6525013	-	PDLIM5
		Zeta	NW_004438415.1	15566735	15521916	-	POMT2
			NW_004438415.1	15613775	15590372	-	TMED8
		Theta	NW_004450381.1	1413558	1549630	+	CABIN1
			NW_004450381.1	1393813	1396029	+	DDT
			NW_004450381.1	1268140	1268465	+	MIF
		Pi	NW_004438509.1	4439792	4437029	-	CABP2
			NW_004438509.1	4499234	4504544	+	NDUFV1
		Omega	NW_004450415.1	4104072	4084419	-	CFAP43
			NW_004452741.1	75285	73655	-	ITPRIP
Yangtze finless porpoise		Alpha	scaffold962	455701	455614	-	FBXO9
			scaffold962	482938	514082	+	ICK
			scaffold962	602184	596981	-	TMEM14A
			scaffold35	1277318	1276299	-	AMPD2
		Mu	scaffold35	1178688	1188780	+	EPS8L3
			scaffold35	1289330	1297537	+	GNAT2
			scaffold7	15027212	14958631	-	SMARCAD1
		Sigma	scaffold7	14797256	14797162	-	PDLIM5
			scaffold49	2748169	2789136	+	POMT2
		Zeta	scaffold49	2701787	2725273	+	TMED8
			scaffold110	7857624	7867428	+	CABIN1
		Theta	scaffold110	7846882	7849186	+	DDT
			scaffold110	7798067	7798675	+	MIF
			scaffold43	5291594	5294416	+	CABP2
			scaffold43	5237336	5232060	-	NDUFV1
		Pi	scaffold240	6694367	6675702	-	CFAP43
			scaffold240	6838390	6836761	-	ITPRIP
Baiji	Lipotes vexillifer	Alpha	NW_006778796.1	4926567	4926654	+	FBXO9
			NW_006778796.1	4868873	4899927	-	ICK
			NW_006778796.1	4775658	4781470	+	TMEM14A
			NW_006778796.1	4681891	4605996	-	TRAM2
		Mu	NW_006774564.1	2131418	2130442	-	AMPD2
			NW_006774564.1	2021809	2032517	+	EPS8L3
			NW_006774564.1	2143308	2151475	+	GNAT2
		Sigma	NW_006775603.1	4779479	4847706	+	SMARCAD1
			NW_006775603.1	5015103	5015197	+	PDLIM5
		Zeta	NW_006787038.1	4020156	3974523	-	POMT2
			NW_006787038.1	4069486	4045456	-	TMED8
		Theta	NW_006777435.1	868336	878043	+	CABIN1
			NW_006777435.1	857912	860203	+	DDT
			NW_006777435.1	809068	809653	+	MIF
		Pi	NW_006776536.1	655128	657237	+	CABP2
			NW_006776536.1	595604	590284	-	NDUFV1
		Omega	NW_006798383.1	4316782	4291736	-	CFAP43
			NW_006798383.1	4454858	4453229	-	ITPRIP
Sperm whale	Physeter macrocephalus	Alpha	NW_006724412.1	289669	289582	-	FBXO9
			NW_006724412.1	315241	346444	+	ICK
			NW_006724412.1	441907	436507	-	TMEM14A
			NW_006724412.1	532060	601700	+	TRAM2
		Mu	NW_006713392.1	567149	568225	+	AMPD2
			NW_006713392.1	649434	639647	-	EPS8L3
			NW_006713392.1	555236	546846	-	GNAT2
		Sigma	NW_006712764.1	344763	276492	-	SMARCAD1
			NW_006712764.1	135864	135770	-	PDLIM5
		Zeta	NW_006713461.1	427912	384373	-	POMT2
			NW_006713461.1	475519	448947	-	TMED8
		Theta	NW_006724217.1	763914	754131	-	CABIN1
			NW_006724217.1	777907	776044	-	DDT
			NW_006724217.1	826675	826608	-	MIF
		Pi	NW_006724202.1	827966	830181	+	CABP2
			NW_006724202.1	769268	763967	-	NDUFV1
		Omega	NW_006714478.1	261703	285570	-	CFAP43
			NW_006714478.1	119375	121004	+	ITPRIP
Minke whale	Balaenoptera acutorostrata	Alpha	NW_006732678.1	7733541	7733628	+	FBXO9
			NW_006732678.1	7705658	7674156	-	ICK
			NW_006732678.1	7561004	7566133	+	TMEM14A
			NW_006732678.1	7462571	5591828	-	TRAM2
		Mu	NW_006725576.1	10520323	10519048	-	AMPD2
			NW_006725576.1	10413596	10424302	+	EPS8L3
			NW_006725576.1	10532636	10540859	+	GNAT2
		Sigma	NW_006727686.1	4954795	4886008	-	SMARCAD1
			NW_006727686.1	4711287	4711193	-	PDLIM5
		Zeta	NW_006727797.1	13606302	13560968	-	POMT2
			NW_006727797.1	13633995	13629778	-	TMED8
		Theta	NW_006733789.1	7627793	7637876	+	CABIN1
			NW_006733789.1	7614122	7616423	+	DDT
			NW_006727686.1	290083	289774	-	MIF
		Pi	NW_006725687.1	19981716	19977679	-	CABP2
			NW_006725687.1	20041351	20046652	+	NDUFV1
		Omega	NW_006725776.1	1278260	1296801	+	CFAP43
			NW_006725776.1	1127974	1129603	+	ITPRIP
Bowhead whale	Balaena mysticetus	Alpha	scaffold_90	911457	911544	+	FBXO9
			scaffold_90	884951	854481	-	ICK
			scaffold_90	739801	745008	+	TMEM14A
			scaffold_90	650710	573902	-	TRAM2
		Mu	scaffold_663	214088	215163	+	AMPD2
			scaffold_663	317758	307790	-	EPS8L3
			scaffold_663	202209	193989	-	GNAT2
		Sigma	scaffold_1495	391832	458473	+	SMARCAD1
			scaffold_2223	97872	97960	+	PDLIM5
		Zeta	scaffold_101	548358	592167	+	POMT2
			scaffold_101	503145	525410	+	TMED8
		Theta	scaffold_2197	240698	250512	+	CABIN1
			scaffold_2197	227757	229542	+	DDT
			scaffold_2197	177251	177330	+	MIF
		Pi	scaffold_331	1297635	1293600	-	CABP2
			scaffold_331	1356398	1361699	+	NDUFV1
		Omega	scaffold_2004	266775	284956	+	CFAP43
			scaffold_2004	118634	120263	+	ITPRIP
Cow	Bos taurus	Alpha	chr23	25035401	25035488	+	FBXO9
			chr23	25012392	24984470	-	ICK
			chr23	24807976	24813524	+	TMEM14A
			chr23	24702830	24638154	-	TRAM2
		Mu	chr3	33939690	33938667	-	AMPD2
			chr3	33754078	33762157	+	EPS8L3
			chr3	33952270	33961051	+	GNAT2
		Sigma	chr6	31821888	31733947	-	SMARCAD1
			chr6	31563859	31563763	-	PDLIM5
		Zeta	chr10	89588988	89544442	-	POMT2
			chr10	89648210	89619638	-	TMED8
		Theta	chr17	73332331	73398919	+	CABIN1
			chr17	73316374	73318851	+	DDT
			chr17	73273476	73274044	+	MIF
		Pi	chr29	46046877	46042427	-	CABP2
			chr29	46108338	46114167	+	NDUFV1
		Omega	chr26	24971852	24953967	-	CFAP43
			chr26	25134743	25133107	-	ITPRIP
Tibetan yak	Bos mutus	Alpha	NW_005394843.1	4831	4918	+	FBXO9
			NW_005394842.1	50501	23555	-	ICK
			NW_005393810.1	16248	10696	-	TMEM14A
			NW_005393810.1	122178	186831	+	TRAM2
		Mu	NW_005393277.1	1450852	1449829	-	AMPD2
			NW_005393277.1	1263856	1274861	+	EPS8L3
			NW_005393277.1	1463672	1472858	+	GNAT2
		Sigma	NW_005395035.1	1196362	1284624	+	SMARCAD1
			NW_005395628.1	1142015	1141919	-	PDLIM5
		Zeta	NW_005398357.1	37927	72034	+	POMT2
			NW_005395767.1	361332	348407	-	TMED8
		Theta	NW_005394378.1	89409	82290	-	CABIN1
			NW_005394378.1	100227	97744	-	DDT
			NW_005392977.1	2359114	2359193	+	MIF
		Pi	NW_005394695.1	1078493	1074042	-	CABP2
			NW_005394695.1	1139099	1143922	+	NDUFV1
		Omega	NW_005394722.1	1090959	1109353	+	CFAP43
			NW_005394722.1	930146	931782	+	ITPRIP
Sheep	Ovis aries	Alpha	chr20	25073891	25073978	+	FBXO9
			chr20	25048918	25022035	-	ICK
			chr20	24857084	24860867	+	TMEM14A
			chr20	24707026	24676856	-	TRAM2
		Mu	chr1	86042012	86043197	+	AMPD2
			chr1	86251113	86241347	-	EPS8L3
			chr1	86030014	86021345	-	GNAT2
		Sigma	chr6	30402687	30314536	-	SMARCAD1
			chr6	30138945	30138849	-	PDLIM5
		Zeta	chr7	85470804	85438073	-	POMT2
			chr7	85527894	85515451	-	TMED8
		Theta	chr17	70612681	70619675	+	CABIN1
			chr17	70600572	70602579	+	DDT
			chr17	70558077	70558137	+	MIF
		Pi	chr21	44685101	44680713	-	CABP2
			chr21	44743104	44748583	+	NDUFV1
		Omega	chr22	23792493	23775258	-	CFAP43
			chr22	23956520	23954997	-	ITPRIP
Tibetan antelope	Pantholops hodgsonii	Alpha	NW_005806736.1	569176	569089	-	FBXO9
			NW_005806736.1	593884	620868	+	ICK
			NW_005806736.1	797934	792673	-	TMEM14A
			NW_005806736.1	908162	971950	+	TRAM2
		Mu	NW_005813453.1	123603	122584	-	AMPD2
			NW_005818795.1	970695	980411	+	EPS8L3
			NW_005813453.1	136234	144858	+	GNAT2
		Sigma	NW_005816419.1	104674	194170	+	SMARCAD1
			NW_005816419.1	369908	370004	+	PDLIM5
		Zeta	NW_005811569.1	2729658	2768793	+	POMT2
			NW_005811569.1	2683986	2696294	+	TMED8
		Theta	NW_005808332.1	342691	349604	+	CABIN1
			NW_005808332.1	330945	332878	+	DDT
			NW_005808332.1	330945	331048	+	DDTL
		Pi	NW_005810996.1	56536	61051	+	CABP2
			NW_005811369.1	1068	5663	+	NDUFV1
		Omega	NW_005813409.1	365405	348160	-	CFAP43
			NW_005813409.1	528996	527360	-	ITPRIP
Weddell seal	Leptonychotes weddellii	Alpha	NW_006386835.1	97492	97634	+	FBXO9
			NW_006385838.1	342658	328385	-	ICK
			NW_006385838.1	164678	172765	+	TMEM14A
		Mu	NW_006384601.1	243385	242404	-	AMPD2
			NW_006384601.1	169335	179265	+	EPS8L3
			NW_006384601.1	255205	263505	+	GNAT2
		Sigma	NW_006383499.1	412598	497304	+	SMARCAD1
			NW_006383499.1	623232	623328	+	PDLIM5
		Zeta	NW_006386919.1	121180	78458	-	POMT2
			NW_006385368.1	394207	432513	+	TMED8
		Theta	NW_006385210.1	90015	103958	+	CABIN1
			NW_006385210.1	65611	67849	+	DDT
			NW_006383120.1	85183	85526	+	MIF
		Pi	NW_006384721.1	318982	322135	+	CABP2
			NW_006384721.1	247726	242368	-	NDUFV1
		Omega	NW_006384846.1	329130	307573	-	CFAP43
			NW_006386699.1	181042	182660	+	ITPRIP
Pacific walrus	Odobenus rosmarus divergens	Alpha	NW_004450762.1	1300214	1300075	-	FBXO9
			NW_004450762.1	1340640	1373414	+	ICK
			NW_004450762.1	1514798	1507745	-	TMEM14A
			NW_004450762.1	1607385	1686519	+	TRAM2
		Mu	NW_004450591.1	1312919	1311955	-	AMPD2
			NW_004450591.1	1238718	1248723	+	EPS8L3
			NW_004450591.1	1324705	1324825	+	GNAT2
		Sigma	NW_004450264.1	6708689	6635694	-	SMARCAD1
			NW_004450264.1	6525109	6525013	-	PDLIM5
		Zeta	NW_004450358.1	1581986	1623397	+	POMT2
			NW_004450358.1	1525869	1559479	+	TMED8
		Theta	NW_004450381.1	1413558	1428837	+	CABIN1
			NW_004450381.1	1393813	1396029	+	DDT
			NW_004450381.1	1267598	1268051	+	MIF
		Pi	NW_004450289.1	2820389	2824125	+	CABP2
			NW_004450289.1	2763589	2758428	-	NDUFV1
		Omega	NW_004450415.1	4104072	4084419	-	CFAP43
			NW_004452741.1	75273	73655	-	ITPRIP
Dog	Canis lupus familiaris	Alpha	NC_006594.3	20534311	20534453	+	FBXO9
			NC_006594.3	20490727	20456789	-	ICK
			NC_006594.3	20308014	20318081	+	TMEM14A
			NC_006594.3	20218668	20140675	-	TRAM2
		Mu	NC_006588.3	42246319	42245208	-	AMPD2
			NC_006588.3	42167110	42176029	+	EPS8L3
			NC_006588.3	42259702	42268082	+	GNAT2
		Sigma	NC_006614.3	17090342	17166619	+	SMARCAD1
			NC_006614.3	17297787	17297883	+	PDLIM5
		Zeta	NC_006590.3	50126692	50092256	-	POMT2
			NC_006590.3	50163551	50156060	-	TMED8
		Theta	NC_006608.3	28505492	28366642	-	CABIN1
			NC_006608.3	28522438	28520398	-	DDT
			NC_006608.3	28642816	28642713	-	MIF
		Pi	NC_006600.3	49960671	49964268	+	CABP2
			NC_006600.3	49888334	49882921	-	NDUFV1
		Omega	NC_006610.3	16463965	16443509	-	CFAP43
			NC_006610.3	16617747	16616092	-	ITPRIP
Horse	Equus caballus	Alpha	NC_009163.2	50683397	50683539	+	FBXO9
			NC_009163.2	50654174	50622170	-	ICK
			NC_009163.2	50315697	50323379	+	TMEM14A
			NC_009163.2	50233434	50162242	-	TRAM2
		Mu	NC_009148.2	58512002	58510643	-	AMPD2
			NC_009148.2	58406950	58417198	+	EPS8L3
			NC_009148.2	58524060	58532755	+	GNAT2
		Sigma	NC_009146.2	44463340	44386157	-	SMARCAD1
			NC_009146.2	44244596	44244500	-	PDLIM5
		Zeta	NC_009167.2	22677945	22637470	-	POMT2
			NC_009167.2	22712405	22700699	-	TMED8
		Theta	NC_009151.2	1462223	1447451	-	CABIN1
			NC_009151.2	1479289	1478655	-	DDTL
			NC_009151.2	1557451	1556856	-	MIF
		Pi	NC_009155.2	27254212	27250289	-	CABP2
			NC_009155.2	27310619	27315744	+	NDUFV1
		Omega	NC_009144.2	26212485	26232107	+	CFAP43
			NC_009144.2	26065621	26067238	+	ITPRIP
Microbat	Myotis lucifugus	Alpha	NW_005871159.1	3582243	3582385	+	FBXO9
			NW_005871159.1	3552457	3522975	-	ICK
			NW_005871159.1	3351079	3356790	+	TMEM14A
			NW_005871159.1	3172273	3130940	-	TRAM2
		Mu	NW_005871149.1	3311940	3318675	+	EPS8L3
			NW_005871149.1	3378627	3385892	+	GNAT2
		Sigma	NW_005871060.1	13639774	13719712	+	SMARCAD1
			NW_005871060.1	13852237	13852333	+	PDLIM5
		Zeta	NW_005871082.1	553937	516705	-	POMT2
			NW_005871082.1	584870	575464	-	TMED8
		Theta	NW_005872469.1	50768	43433	-	CABIN1
			NW_005872469.1	56941	56979	+	DDT
			NW_005871208.1	1863531	1863487	-	MIF
		Pi	NW_005871463.1	509171	512699	+	CABP2
			NW_005871463.1	481628	475827	-	NDUFV1
		Omega	NW_005871210.1	2146862	2130559	-	CFAP43
			NW_005871210.1	2256922	2255305	-	ITPRIP
Mouse	Mus musculus	Alpha	NC_000075.6	78101674	78101529	-	FBXO9
			NC_000075.6	78131471	78167750	+	ICK
			NC_000067.6	21225574	21226679	+	TMEM14A
			NC_000067.6	21079113	21001563	-	TRAM2
		Mu	NC_000069.6	108081120	108080297	-	AMPD2
			NC_000069.6	107879378	107892366	+	EPS8L3
			NC_000069.6	108093263	108100799	+	GNAT2
		Sigma	NC_000072.6	65043256	65114362	+	SMARCAD1
			NC_000069.6	142391808	142391712	-	PDLIM5
		Zeta	NC_000078.6	87147418	87109188	-	POMT2
			NC_000078.6	87200203	87172414	-	TMED8
		Theta	NC_000076.6	75754905	75745285	-	CABIN1
			NC_000076.6	75773278	75771444	-	DDT
			NC_000075.6	14845712	14845369	-	MIF
		Pi	NW_004058054.1	69590	72610	+	CABP2
			NC_000085.6	4012601	4007583	-	NDUFV1
		Omega	NC_000085.6	47756123	47737734	-	CFAP43
			NC_000085.6	47898174	47896545	-	ITPRIP
Naked mole rat	Heterocephalus glaber	Alpha	NW_004624850.1	296084	296229	+	FBXO9
			NW_004624850.1	264980	222753	-	ICK
			NW_004624855.1	3394990	3388848	-	TMEM14A
			NW_004624855.1	3526530	3601537	+	TRAM2
		Mu	NW_004624772.1	5340194	5341001	+	AMPD2
			NW_004624772.1	5512601	5502586	-	EPS8L3
			NW_004624772.1	5326841	5318113	-	GNAT2
		Sigma	NW_004624757.1	22039085	22102009	+	SMARCAD1
			NW_004624757.1	22335917	22336013	-	PDLIM5
		Zeta	NW_004624734.1	24596281	24634415	+	POMT2
			NW_004624734.1	24526501	24562213	+	TMED8
		Theta	NW_004624747.1	10251841	10235137	-	CABIN1
			NW_004624747.1	12474787	12474224	-	DDT
			NW_004624747.1	10308580	10307953	-	MIF
		Pi	NW_004624767.1	19017868	19022159	+	CABP2
			NW_004624767.1	18938519	18934141	-	NDUFV1
		Omega	NW_004624831.1	3251933	3234870	-	CFAP43
			NW_004624831.1	3385279	3383657	-	ITPRIP
Elephant	Loxodonta africana	Alpha	NW_003573420.1	110549716	110549574	-	FBXO9
			NW_003573420.1	110591315	110629142	+	ICK
			NW_003573420.1	110896814	110892389	-	TMEM14A
			NW_003573420.1	110988677	111070485	+	TRAM2
		Mu	NW_003573431.1	54436889	54437769	+	AMPD2
			NW_003573431.1	54788976	54778840	-	EPS8L3
			NW_003573431.1	54421483	54412282	-	GNAT2
		Sigma	NW_003573450.1	570705	480975	-	SMARCAD1
			NW_003573450.1	266559	266463	-	PDLIM5
		Zeta	NW_003573429.1	53387302	53325836	-	POMT2
			NW_003573429.1	53442382	53411791	-	TMED8
		Theta	NW_003573488.1	833641	851337	+	CABIN1
			NW_003573488.1	803127	805308	+	DDT
			NW_003573488.1	708926	709565	+	MIF
		Pi	NW_003573491.1	2081847	2084954	+	CABP2
			NW_003573491.1	1986500	1980753	-	NDUFV1
		Omega	NW_003573430.1	14310048	14335816	+	CFAP43
			NW_003573430.1	14157407	14159021	+	ITPRIP
West Indian manatee	Trichechus manatus latirostris	Alpha	NW_004444151.1	3732069	3732211	+	FBXO9
			NW_004444151.1	3687211	3647074	-	ICK
			NW_004444151.1	3456212	3460807	+	TMEM14A
			NW_004444151.1	3370039	3276888	-	TRAM2
		Mu	NW_004444140.1	252800	251847	-	AMPD2
			NW_004444233.1	1299504	1311304	+	EPS8L3
			NW_004444140.1	267319	276174	-	GNAT2
		Sigma	NW_004444114.1	3323314	3197411	-	SMARCAD1
			NW_004444114.1	2989742	2989646	-	PDLIM5
		Zeta	NW_004443946.1	30217557	30173969	-	POMT2
			NW_004443946.1	30272948	30243662	-	TMED8
		Theta	NW_004444093.1	2163645	2182048	+	CABIN1
			NW_004444093.1	2123696	2125890	+	DDT
			NW_004444093.1	1908160	1908783	+	MIF
		Pi	NW_004444049.1	3887233	3942386	+	CABP2
			NW_004444049.1	3802231	3796595	-	NDUFV1
		Omega	NW_004443943.1	30660205	30633354	-	CFAP43
			NW_004443943.1	30833757	30832140	-	ITPRIP
